# Supplementary material for: Redox-active Cu(i) boron imidazolate framework for mechanochromic and catalytic applications
Source: Royal Society of Chemistry journal article supplement (doi:10.1039/c4cc02057j), 2014-05-15
Supplement: c4cc02057j1.pdf [file c4cc02057j1.pdf]

*Electronic Supplementary Information (ESI) for*

## **Redox-active Cu(I) Boron Imidazolate Framework for Mechanochromic and Catalysis**

Tian Wen<sup>a</sup>, De-Xiang Zhang<sup>a</sup>, Hai-Xia Zhang<sup>a</sup>, Hua-Bin Zhang<sup>a</sup>, Jian Zhang<sup>a,\*</sup> and Dong-Sheng  
Li<sup>b,\*</sup>

*<sup>a</sup>State Key Laboratory of Structural Chemistry, Fujian Institute of Research on the Structure of  
Matter, Chinese Academy of Sciences, Fuzhou, Fujian 350002, P. R. China. E-mail:*

*zhj@fjirsm.ac.cn*

*<sup>b</sup>College of Materials & Chemical Engineering, China Three Gorges University, Yichang 443002,*

*P. R. China. E-mail: lidongsheng1@126.com*

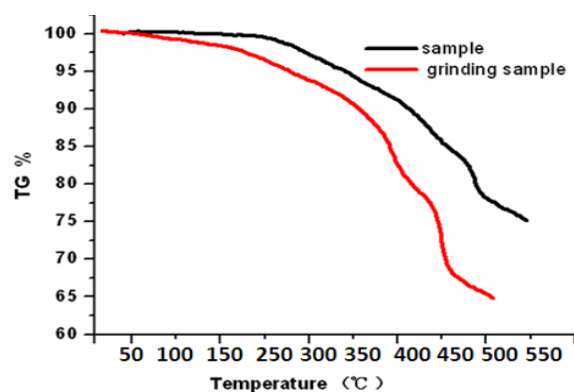

**Fig. S1** Thermogravimetric analyses of **BIF-34** and its ground sample.

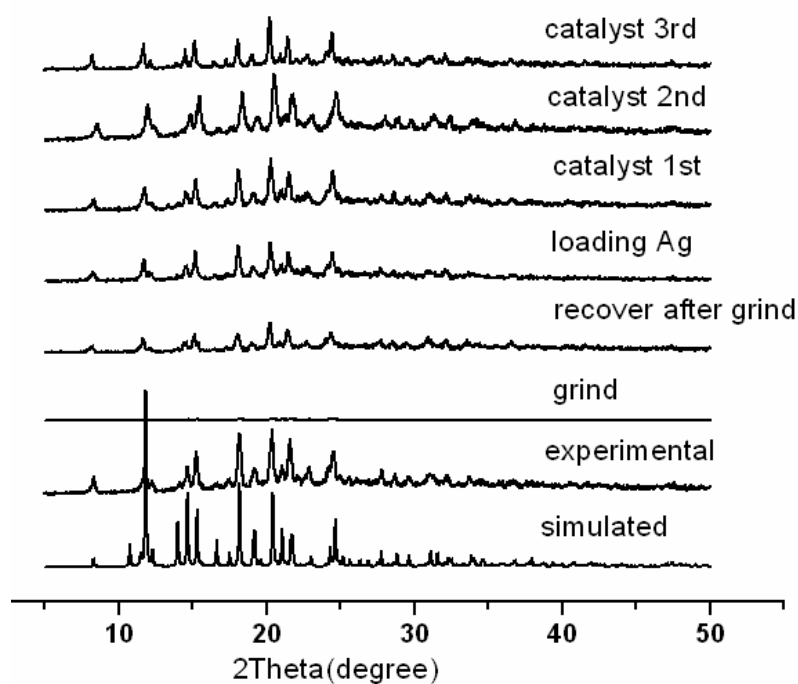

**Fig. S2** The PXRD patterns of **BIF-34** under different conditions.

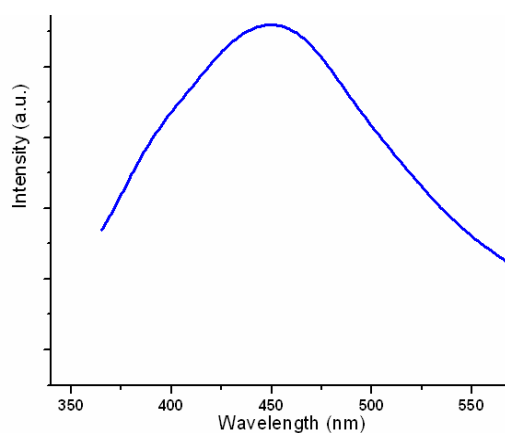

**Fig. S3** The solid-state emission spectra ( $\lambda_{\text{exc}} = 355 \text{ nm}$ ) for the ligand sample of KBH (dm-bim)<sub>3</sub>.

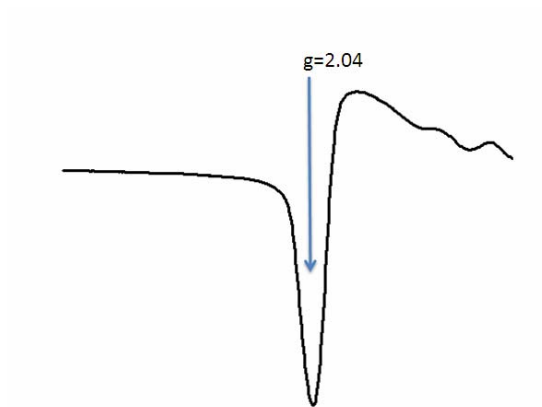

**Fig. S4** EPR spectrum of Ag@BIF-34.

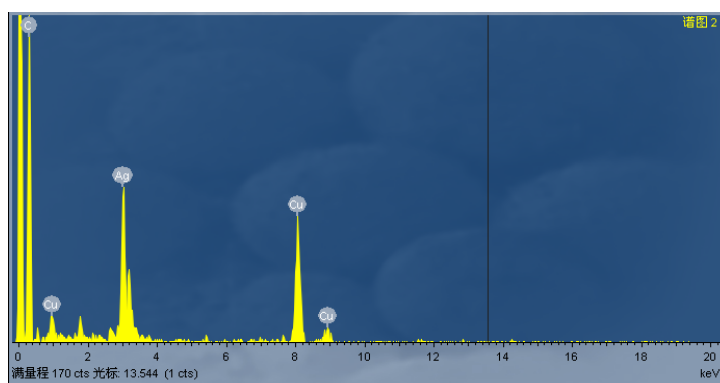

**Fig. S5** EDS of Ag@BIF-34.

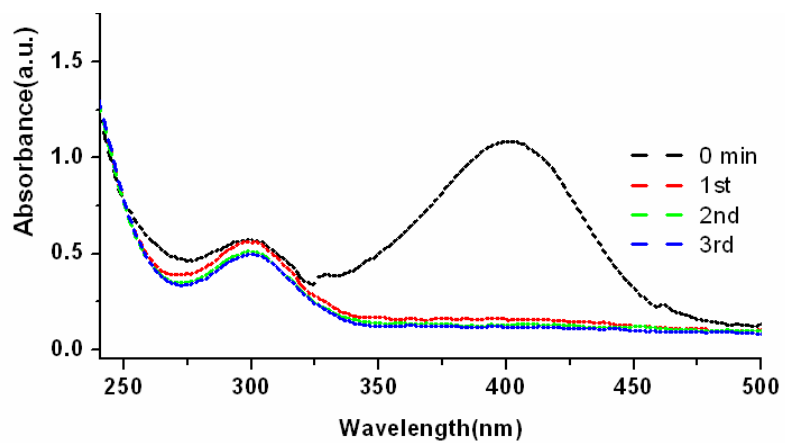

**Fig. S6** Recycling test on reduction of 4-NP over Ag@BIF-34.

**Table S1.** The test the amount of the Ag nanoparticles after each cycle of the catalytic reaction for the reduction of 4-nitrophenol by ICP-AES.

| Runs for catalyst of Ag@BIF-34 | the amount of the Ag nanoparticles |
|--------------------------------|------------------------------------|
| 1st                            | 2.80%                              |
| 2nd                            | 2.71%                              |
| 3rd                            | 2.61%                              |

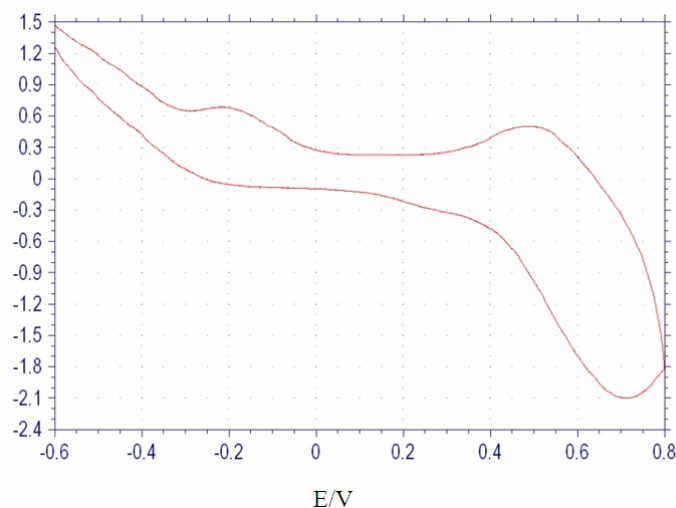

**Fig. S7** Cyclic voltammograms of **BIF-34** films on FTO substrates measured in DMF solution at a scan rate of  $50 \text{ mVs}^{-1}$ .

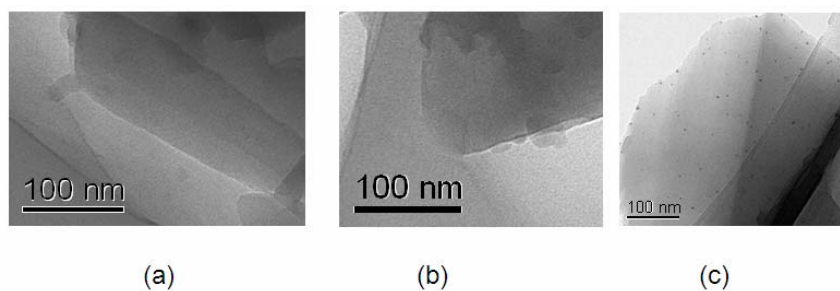

**Fig. S8** (FE)TEM images immersed in a aqueous solution of  $\text{AgNO}_3$  (a: **BIF-1-Cu**, b:  $\text{kB(im)}_4$ , c:  $\text{KBH(dm-bim)}_3$ ). In order to investigate the active B–H bonds from tridentate coordinated  $\text{BH(dm-bim)}_3^-$  ligands, we did some control experiments. We chose the tetradentate coordinated **BIF-1-Cu** and tetradentate  $\text{B(im)}_4^-$  ligand<sup>1</sup>.  $\text{Ag}(0)$  nanoparticles can not be obtained under the same conditions as **Ag@ BIF-34**. However, the potentially active B–H bonds from tridentate coordinated  $\text{BH(dm-bim)}_3^-$  ligand could sever as the reducing agent and contribute to the direct formation of Ag nanoparticles.

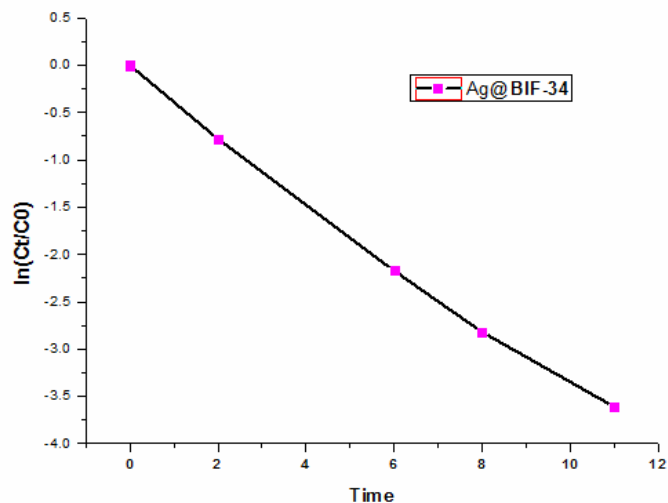

**Fig. S9** The kinetics study of the catalytic reaction on reduction of 4-NP over Ag@BIF-34.

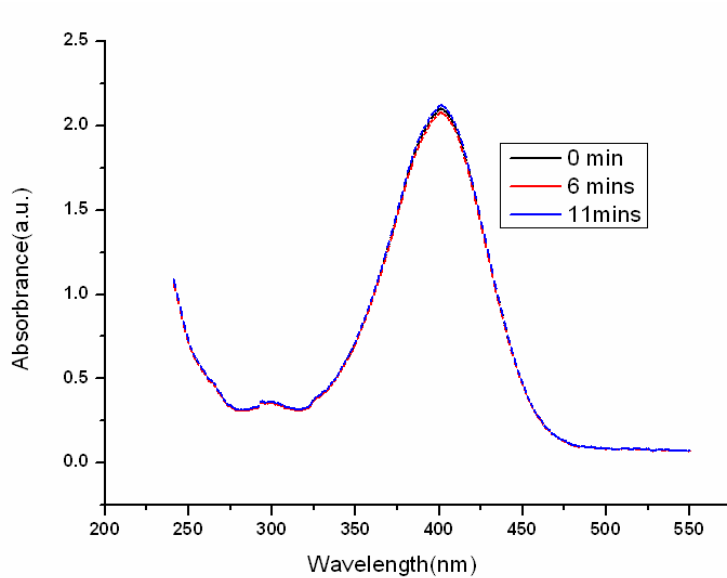

**Fig. S10** View of UV-vis spectra BIF-34 immersed 4-NP (showing no gradual reduction).
